# Supplementary material for: Assessment of current methane emissions quantification techniques for natural gas midstream applications
Source: Copernicus journal article supplement (doi:10.5194/amt-2023-97), 2023-07-10
Supplement: Supplementary file 1 [file amt-2023-97-supplement.pdf]

Supplement of

## Assessment of current methane emissions quantification techniques for natural gas midstream applications

Liu et al.

Correspondence to: Yunsong Liu (yunsongliu@yeah.net)

### Figures and Pictures

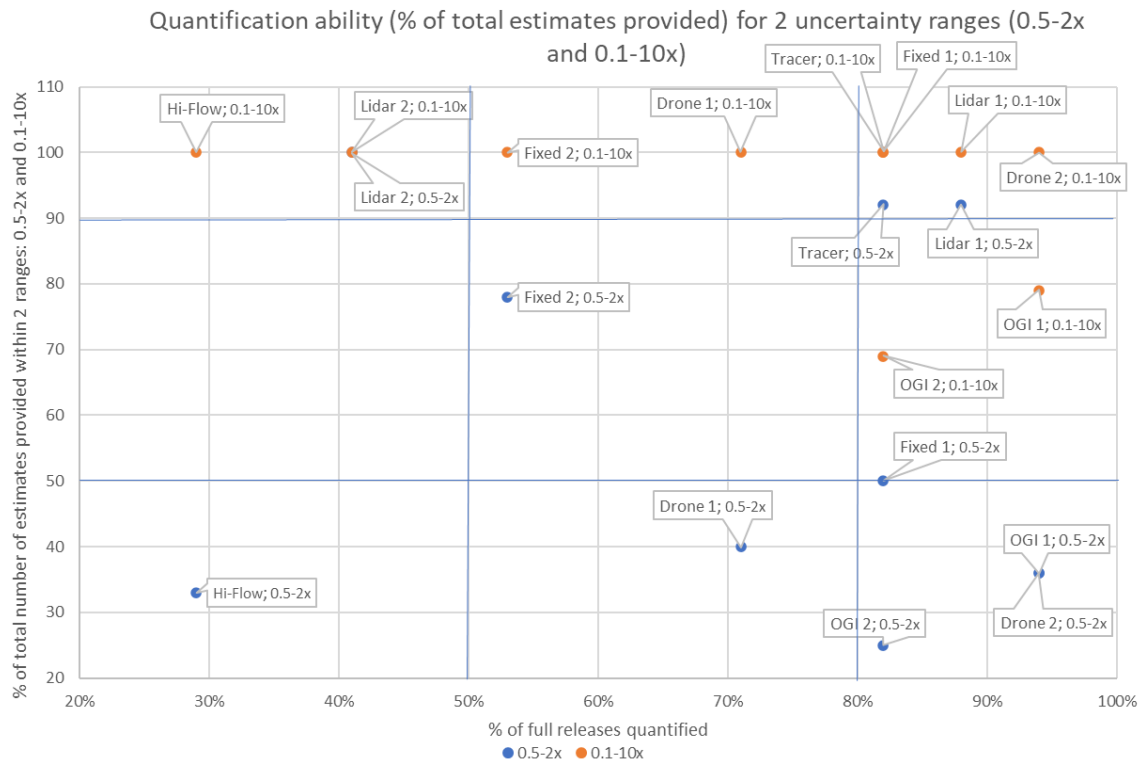

Figure S1: Quantification ability (% of total estimates provided) for 2 uncertainty ranges (0.5-2x and 0.1-10x).
